# Supplementary material
Source: publisher site journal article supplement (https://www.dovepress.com/article/364076)
Supplement: Supplementary file 1 [file get_supplementary_file.php]

## SUPPLEMENTARY MATERIAL

We present the parameter estimates table for the final model below:

**Table S1** Parameter estimates for the final spatial moving average (SMA) model

| <b>Model Parameter</b>  | <b>Parameter Estimate</b> | <b>Standard Error</b> | <b>P-value</b> |
|-------------------------|---------------------------|-----------------------|----------------|
| Intercept               | 16.813                    | 13.171                | 0.20           |
| Cig/Alcohol Expenditure | 2.426                     | 1.479                 | 0.10           |
| Age>65 %                | 2.994                     | 0.341                 | <0.0001        |
| Nitrogen Dioxide        | 0.121                     | 0.061                 | 0.046          |
| Temperature             | -1.489                    | 0.391                 | 0.0001         |
| Lemon Consumption       | -1.809                    | 0.908                 | 0.046          |
| _lambda                 | -13.221                   | 4.261                 | 0.0019         |
| _sigma2                 | 72.026                    | 11.938                | <0.0001        |
